# Supplementary material for: Transition to cubic phase and enhancement of green upconversion emission by adding La3+ ions in hexagonal NaLuF4:Yb3+/Er3+ nanocrystals
Source: Royal Society of Chemistry journal article supplement (doi:10.1039/c3ce42490a), 2014-01-01
Supplement: c3ce42490a.pdf [file c3ce42490a.pdf]

## Supplementary Information

### Transition to cubic phase and enhancement of green upconversion emission by adding $\text{La}^{3+}$ ions in hexagonal $\text{NaLuF}_4:\text{Yb}^{3+}/\text{Er}^{3+}$ nanocrystals

Guotao Xiang<sup>a,b</sup>, Jiahua Zhang<sup>\*,a</sup>, Zhendong Hao<sup>a</sup>, Xia Zhang<sup>a</sup>, Yongshi Luo<sup>a</sup>,  
Shaozhe Lü<sup>a</sup> and Haifeng Zhao<sup>a</sup>

<sup>a</sup> *State Key Laboratory of Luminescence and Applications, Changchun Institute of Optics, Fine Mechanics and Physics, Chinese Academy of Sciences, 3888 Eastern South Lake Road, Changchun 130033, China*

<sup>b</sup> *Graduate School of Chinese Academy of Sciences, Beijing, 100039, China*

E-mail: [zhangjh@ciomp.ac.cn](mailto:zhangjh@ciomp.ac.cn)

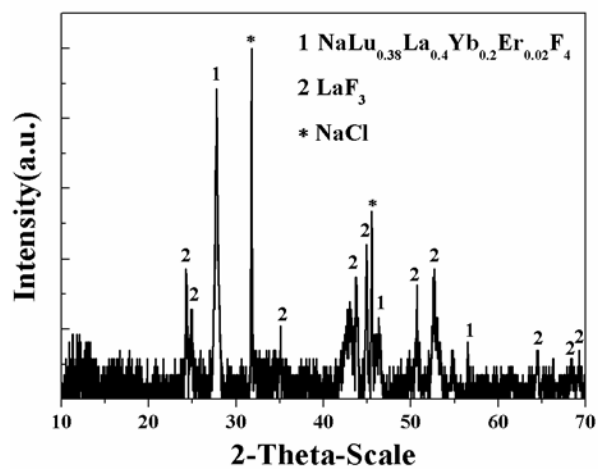

Fig. S1 The XRD patterns of  $\text{NaLu}_{0.38}\text{La}_{0.4}\text{Yb}_{0.2}\text{Er}_{0.02}\text{F}_4$  NCs.
